# Supplementary material for: KIT-c-Jun Signaling Up-regulated HMGCS1 to Promote Colorectal Cancer Development
Source: Research Square preprint supplement (doi:10.21203/rs.3.rs-1508182/v2), 2022-04-19
Supplement: Supplementary file 1 [file 03035ecc557f2040db34db86.docx]

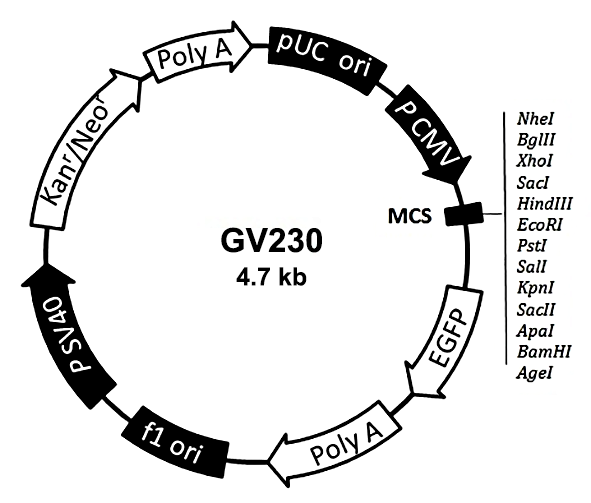
**Supplementary Figures**

**
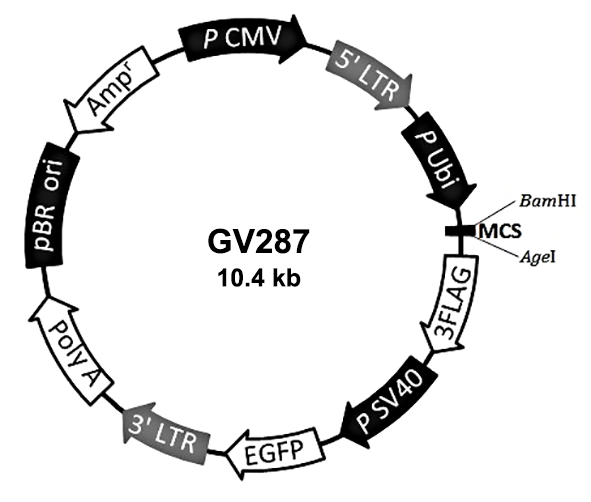
Fig. S1.** Scheme of AP-1 over-expression plasmid

**Fig. S2.** Scheme of lentivirus for KIT over-expression
